# Supplementary material for: The effect of water ingress on additively manufactured electrodes
Source: Royal Society of Chemistry journal article supplement (doi:10.1039/d2ma00707j), 2022-01-01
Supplement: d2ma00707j1.pdf [file d2ma00707j1.pdf]

# **Supporting Information: The effect of water ingress on 3D printed electrodes**

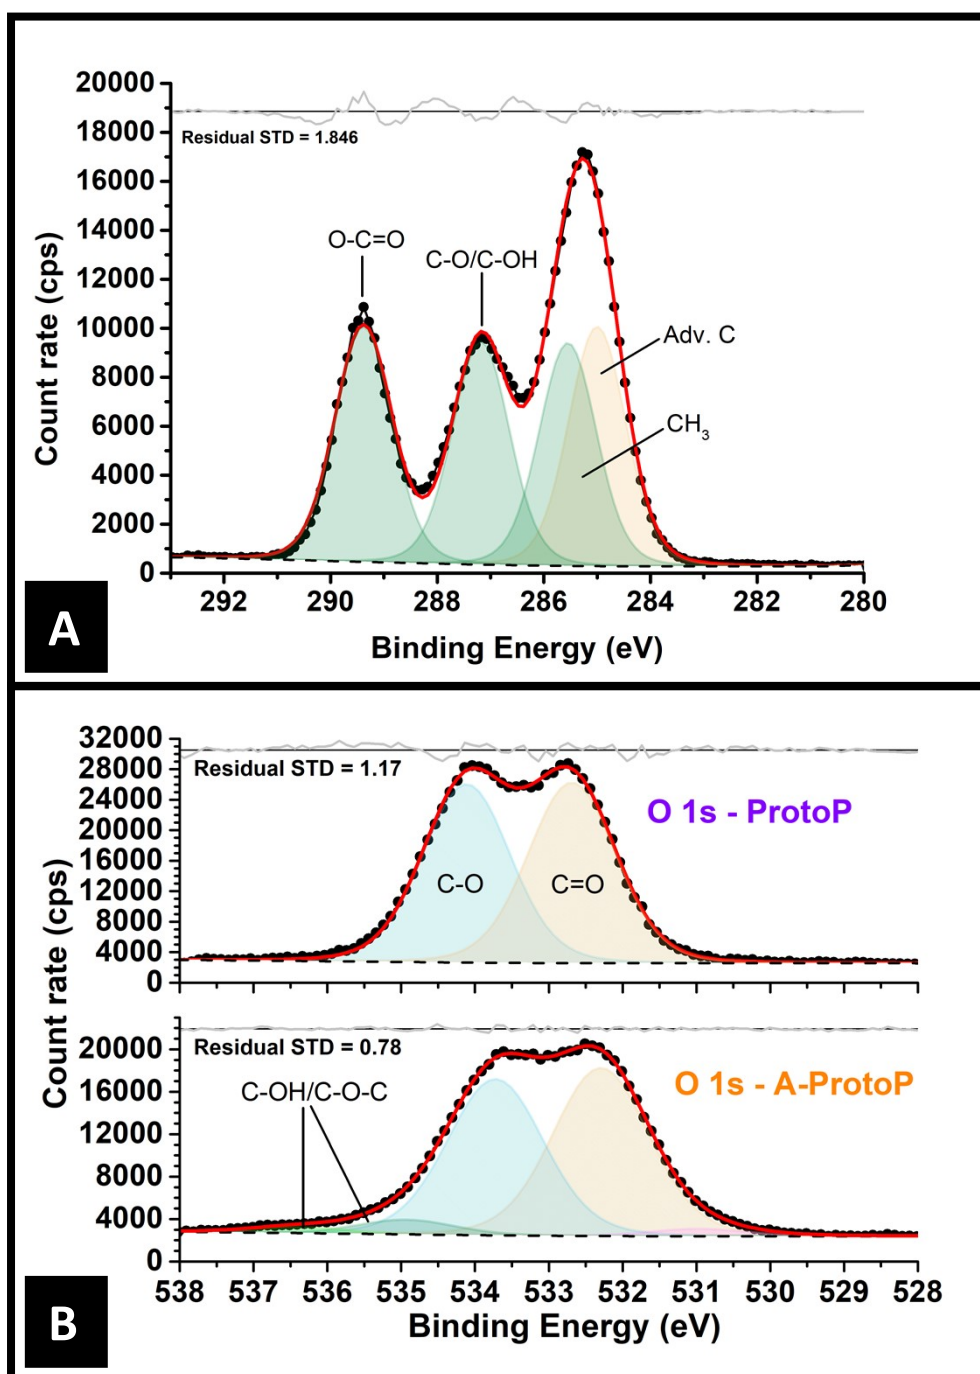

**Figure SI 1** – (A) The XPS C 1s region for PLA, which is similar to data for ProtoP; (B) the O 1s region ProtoP and A-ProtoP. It can be seen that additional O 1s peaks are required to fit the data after activation, which is consistent with generation of new oxygen bearing functional groups after hydrolysis.

## X-ray photoelectron spectroscopy:

## Scanning Electron Microscopy:

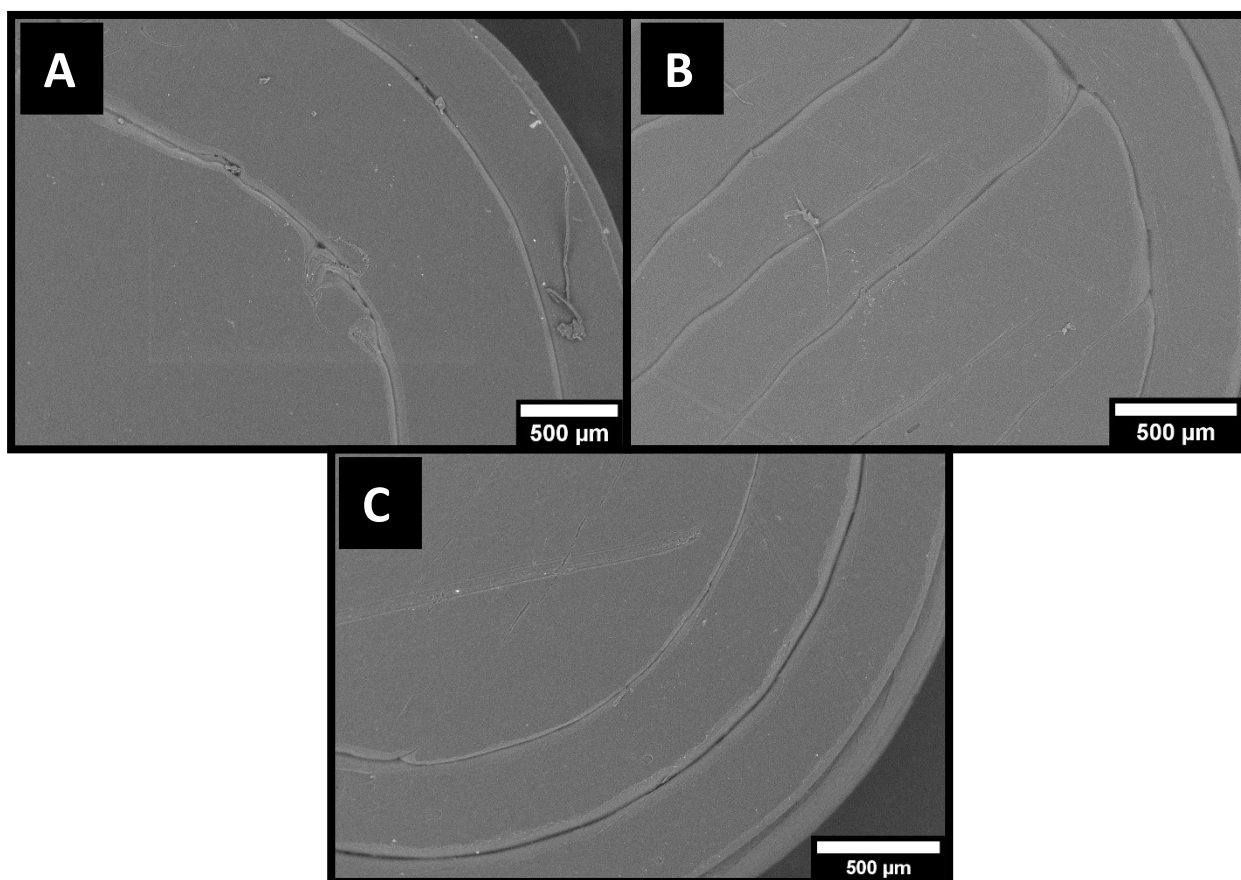

**Figure SI 2** – Representative SEM images of PLA (A), ProtoP (B), and A-ProtoP (C), in this case the bottom (as printed) surface. Superficially, there do not appear to be any structural differences (e.g. cracks or holes) which might cause differences in water uptake.
